# Supplementary material
Source: HighWire-hosted journal article supplement (https://err.ersjournals.com/content/31/165/220038)
Supplement: inline-supplementary-material-1 [file inline-supplementary-material-1.xlsx]

## Sheet: Sheet1
Table S1. Overview of the reviewed studies on ambient air pollution related metabolome profiles
Study (1st author, year)	Study design	Study period	Study location	Population chracteristics (age, special features)	Study size	Metabolome assessment, tissue	Type of air pollutants	Air pollution exposure assessment	Duration of exposure (short-/long-term)	Main findings		Comments
										Metabolites	Pathways (Method)
Li, 2021	Cross-sectional	2008–12	Atlanta, USA	Univeristy-affiliated emoloyees (median age 51y)	180	LC-MS, with ESI modes, plasma	CO, NO2, O3, PM2.5, EC, OC	routine monitoring	Short (1-2 days)	3421 features significantly associated with at least one air pollutant by either exposure window by negative ion mode, and 1691 features by positive ion mode	21 pathways (Mummichog), including nucleic acids damage and repair pathways (i.e., purine metabolism, pyrimidine metabolism), nutrient metabolism (i.e., fatty acid metabolism, vitamin A metabolism), and acute inflammation (i.e., histidine metabolism, tyrosine metabolism, alanine and aspartate metabolism).
Nassan, 2021	Cohort	2000-16	Boston, USA	Men (mean age 75y)	456	UPLC-MS/MS, plasma	PM2.5, NO2, O3	routine monitoring	Long (12m)	58 metabolites with PM2.5, 15 metabolites with NO2, no metabolites associated with O3	(MetaboAnalyst 4.0): 5 pathways with PM2.5: glycerophospholipid, sphingolipid, propanoate and glutathione metabolism; NO2 was not significantly associated with any metabolic pathways.
Nassan, 2021	Cohort	2000-16	Boston, USA	Men (mean age 75y)	456	UPLC-MS/MS, plasma	PM2.5, NO2, O3	routine monitoring	Short (1 day, 1 week, 1 m)	19 differential metabolites for NO2, mostly lipids	MetaboAnalyst 4.0: sphingolipid and butanoate metabolisms
Nassan, 2021	Cohort	2000-16	Boston, USA	Men (mean age 75y)	456	UPLC-MS/MS, plasma	PM2.5 and 14 of its species (BC, UFPs, Na, Ni, Al, Si, S, K, V, Fe, Ti, Zn, Se, Pb)	routine monitoring	Short (1 day, 1 week, 1 m); Long (12 m)	62 metabolites with UFP, followed by Ni (14 metabolites, all of them with the 30-day window only), V (5 metabolites), K (3 metabolites), Si and Al (2 metabolites each).	12 pathways (MetaboAnalyst 4.0):Glycerophospholipid and Butanoate metabolisms with UFPs and Ni, Sphingolipid metabolism with UFPs, Ni, V, and K, Glutathione metabolism with UFPs, Ni, V, and Si, Beta-alanine metabolism with UFPs, Pyrimidine metabolism with UFPs and Si, Propanoate metabolism with UFPs and K, Purine metabolism with Ni, Al, and K, Arginine biosynthesis with V, Porphyrin and chlorophy…
Chu, 2021	Cohort	2015-16	Nanjing, China	College students	78	UPLC-Q/TOF-MS, plasma	PM2.5, PM10	routine monitoring	Short	25 metabolites with PM2.5, mostly phospholipids
Du, 2021	A randomized crossover trial	Oct-Dec 2019	Shanghai, China	College students	69	GS-MS and UPLC-MS, serum	Ultafine PM, PM2.5, BC, NO2, CO	Real-time personal exposure	Short	122 metabolites with TRAP exposure (involved in amino acid, glucose, and fatty acid metabolisms); 119 metabolites associated with UFP, 119 metabolites with CO, 118 metabolites with NO2, 108 metabolites with BC, and 7 metabolites with PM2.5	leukotriene biosynthesis, eicosanoid signaling, citrulline metabolism, L-glutamine biosynthesis, prostanoids biosynthesis, citrulline-nitric oxide cycle, and methionine degradation
Ritz, 2021	cohort	1998-2007	California, US	Newborns	241	LC-HRMS, serum	PM2.5	Dispersion modelling	Long	402 HILIC positive and 182 C18 negative features with increasing third trimester PM2.5	9 pathways (Mummichog): De novo fatty acid biosynthesis, Fatty acid activation, Carnitine shuttle, Prostaglandin formation from arachidonate, Glycerophospholipid metabolism, Arachidonic acid metabolism, Fatty Acid Metabolism, Methionine and cysteine metabolism
Feng, 2021	Cohort	2014-16	Beijing, China	nonsmoking healthy adults aged 18–50 years	73	HPLC-MS/MS, plasma	PM2.5, BC, CO and SO2	routine monitoring	Short	Amino acids (eg, alanine, threonine and glutamic acid)	Pathway enrichment analysis (www.metaboanalyst.ca): ascorbate and aldarate metabolism; phenylalanine metabolism; alanine, aspartate and glutamate metabolism; pentose and glucuronate interconversions; cysteine and methionine metabolism
Gaskins, 2021	Cohort	2005-15	Boston, USA	women undergoing a fresh assisted reproductive technology	200	LC–HRMS, serum	Ozone, PM2.5, PM10, BC	spatio-temporal model (satellite remote sensing data in combination with land use)	Short	exposure to NO2, O3, PM2.5, and BC in the 3 months prior to serum collection was associated with 37, 5, 104, and 1 feature(s), respectively.	butanoate, beta-alanine, tryptophan, linoleate metabolism, urea cycle/amino group metabolism, and vitamin B3 metabolism
Huan, 2021	Longitudinal	2017	Baoding city, Hebei, China	College students	63	UPLC-MS, serum	PM2.5	Personal monitoring	Short	14 metabolites related to metabolisms of heme, energy and oxidative stress, phospholipid, and tryptophan
Jin, 2021*	Review	Publications during 2012-19		Adults, children, or pregnant women	23 out of 315 articles	Primarily untargeted metabolomics, different tissues	Most commonly PM2.5, [Table 1]	See Table 1 in Jin et al. 2021	Table 1		air pollutant exposures are associated with metabolic pathways primarily related to oxidative stress, inflammation	differ by disease status, sex, and age
*for original studies included in the previously published review see Jin et al. Use of Untargeted Metabolomics to Explore the Air Pollution-Related Disease Continuum. Curr Environ Health Rep. 2021 Mar;8(1):7-22. doi: 10.1007/s40572-020-00298-x. Epub 2021 Jan 9. PMID: 33420964.
