# Supplementary material
Source: HighWire-hosted journal article supplement (https://err.ersjournals.com/content/31/165/220038)
Supplement: inline-supplementary-material-2 [file inline-supplementary-material-2.xlsx]

## Sheet: Sheet1
Table S2. Overview of the reviewed studies on metabolomics and lung function
Study (1st author, year)	Study design	Study period	Study location	Population characteristics (age, special features)	Study size	Biospecimen	Metabolome assessment	Total metabolites identified	Lung function outcomes	Main findings		Notes
Kelly, 2017	Cross-sectional	2001-2008	Costa Rica	Children with asthma, mean age 9.1	380	Plasma sample	untargeted LC-MS	18062 features	FEV1/FVC ratio	102 metabolites associated with FEV1/FVC pre-bronchodilator, 155 metabolites associated with FEV1/FVC post-bronchodilator	MetaboAnalyst v.2.5: three pathways were enriched (glycerophospholipid, linoleic acid and pyrimidine metabolism)
Kelly, 2018	Cross-sectional	2001-2008	Costa Rica	Children with asthma, mean age 9.1	325	Plasma sample	untargeted LC-MS	8185 features	FEV1， FEV1/FVC ratio	8 modules with different number of metabolite features identified	MetaboAnalyst v.3.0: six pathways were enriched: GPI-anchor biosynthesis, sphingolipid metabolism, glycerolipid metabolism, glycerophopholipid metabolism, caffeine metabolism, purine metabolism	This study integrates transcriptomic with metabolomics
McClay, 2010	Case-control	1998-2001, 2003-2004	US	Adult with and without COPD, mean age 64.7 for cases and 57.0 for controls	197 with COPD and 195 without COPD	Urine and plasma samples	NMR spectrometer	148 for urine and 177 for plasma	FEV1	metabolites trigonelline, hippurate and formate significantly associated with baseline FEV1	NA
Mastej, 2020	Case-control	2013-2017	US (COPDGene study)	Adult with and without COPD, mean age 68	1008	Plasma sample	untargeted GC-MS/LC-MS	1392 metabolites	Percent predicted FEV1	A protein-metabolite network consisting of 13 proteins and 7 metabolites had a negative correlation to lung function	NA	This study integrates proteomics with metabolomics
Gillenwater, 2020	Case-control	2013-2017	US (COPDGene study,SPIROMICS cohort)	Adult with and without COPD, mean age 68.3	957	Plasma sample	untargeted LC-MS/MS	995 metabolites	Percent predicted FEV1, FEV1/FVC ratio	99 metabolites from 30 subclasses were significantly associated with FEV1/FVC, with glycophosphatidylinositol, propionylcarnitine, ergothioneine, a xenobiotic most strongly assoicated; 79 metabolites from 23 subclasses were significantly associated with FEV1 Percent predicted, with lipid phosphocholine, ergothioneine and carbohydrate N6-carboxymethyllysine most significantly assoicated	diacylglycerol and BCAA (leucine, isoleucine,and valine) subpathways
Cruickshank-Quinn, 2018	Cross-sectional	2013-2017	US (COPDGene study)	Adult with COPD, mean age 64.0	131	Plasma sample	untargeted LC-MS/MS	2999 metabolites	FEV1/FVC ratio, FEV1 Percent predicted, Percent emphysema on CT scan	32 metabolites associated with FEV1 Percent predicted, 269 metabolites associated with FEV1/FVC ratio	15 pathways associated with FEV1/FVC ratio, 22 pathways with FEV1 Percent predicted
Bottolo, 2020	Case-control	2019	UK	Adult with and without LAM, mean age 49.6	79 with LAM and 43 healthy controls	Serum sample	untargeted LC-MS/MS	1326 metabolites	FEV1, FEV1 decline	Sphingolipid, fatty acid and phospholipid metabolites were associated with FEV1 in women with LAM	MetaboAnalyst v4.0: Metabolomic pathway analysis within modules reiterated the importance of glycerophospholipid metabolites
Stromberg, 2019	Case-control	2011-2015	US (SPIROMICS cohort)	Adult with and without COPD, mean age 64 for cases and 57 for controls	47 with COPD, 56 smoking controls, 12 non-smoker controls	Plasma and BAL fluid	untargeted LC-MS/MS	7939 for BAL and 10561 for plasma	FEV1/FVC, emphysema, FEV1 percent predicted	FEV1/FVC ratio, emphysema, FEV1 % predicted, and COPD exacerbations associated with 1230, 792, eight, and one BAL compounds, respectively. Only two plasma compounds associated with a COPD phenotype (emphysema)	NA
Wendt, 2016	Case-control	NA	US (FORTE study)	Adult with and without COPD, mean age 66.2	59 with COPD and 20 healthy controls	BAL fluid	untargeted LC-MS/MS	over 3900 metabolites	pre- and post- bronchodilator FEV1, FVC, FEV1/FVC ratio	Multiple peptide analytes associated with FEV1 and FEV1/FVC ratio	NA
Oh, 2018	Case only	2015-2016	Republic of Korea	Adult with COPD (mean age 67.0), asthma (mean age 57.0), asthma-COPD overlap (mean age 64.0)	107	Urine sample	untargeted LC-MS	5213 metabolites	FEV1, FVC, FEV1/FVC ratio	223 were found significant between the ACO and asthma group urine samples, whereas 215 features were significantly different between the ACO and COPD group urine samples.	NA
Ghosh, 2019	Case-control	2017	India	Adult with COPD, asthma, asthma-COPD overlap (mean age 50-55)	236	Serum sample	NMR spectrometry	34 metabolites	FEV1, FEV1/FVC ratio	12 metabolites [lipid, isoleucine, N-acetylglycoproteins (NAG), valine, glutamate, citric acid, glucose, L-leucine, lysine, asparagine, phenylalanine and histidine] were dysregulated in ACO patients when compared with both asthma and COPD.	aminoacyltRNA biosynthesis, glycolysis/gluconeogenesis, valine/leucine/isoleucine biosynthesis and degradation, tricarboxylic acid (TCA) cycle, glutamine/glutamate metabolism and histidine metabolism
Ghosh, 2020	Case-control	2017	India	Adult with COPD, asthma, asthma-COPD overlap (mean age 50-55)	236	Serum sample	GC-MS	145 metabolites	FEV1, FEV1/FVC ratio	11 metabolites [serine, threonine, ethanolamine, glucose, cholesterol, 2-palmitoylglycerol, stearic acid, lactic acid, linoleic acid, D-mannose and succinic acid] were found to be significantly altered in ACO as compared with asthma and COPD	Metaboanalyst 4.0: Various common significantly altered pathways were observed in ACO vs. asthma and ACO vs. COPD, including starch and sucrose metabolism, linoleic acid metabolism, glycolysis / gluconeogenesis, citrate cycle (TCA cycle), glycine, serine and threonine metabolism and aminoacyltRNA biosynthesis
Ghosh, 2021	Case-control	2017	India	Adult with COPD, asthma, asthma-COPD overlap (mean age 50-55)	236	Serum sample	NMR spectrometry	34 metabolites	FEV1, FEV1/FVC ratio	8 metabolites [Fatty acid, propionate, isopropanol, lactate, acetone, valine, methanol, formate]	NA
Menni, 2013	Cross-sectional	2003-2010	UK (TwinsUK study), Germany (KORA F4)	Adult, mean age 53.4	6055 from UK, 887 from Germany	Serum and plasma samples	untargeted LC-MS	280 metabolites in serum samples, 456 metabolites in plasma samples	FEV1, FVC	C-glycosyl tryptophan strongly correlated with FEV1	Tryptophan metabolism	This study intergrates epigenomic with metabolomics
Yu, 2019	Cross-sectional	1987-1989, 2006-2008	US (ARIC cohort) AND Germany (KORA)	Adult, mean age 53.7	4742	Fasting serum sample	untargeted GC-MS/LC-MS/MS	368 metabolites	FEV1, FVC, FEV1/FVC ratio	95 metabolites were associated with FEV1 and 100 with FVC (73 overlapping), 10 with FEV1/FVC	amino acid metabolism
Prokic, 2020	Case-control	1989-2018	The Netherlands	Adult, mean age 62.8	5557 in discovery sample, 12205 in validation sample	Plasma sample	NMR spectrometry	161 metabolites	FEV1/FVC ratio	valine and GlycA were associated with FEV1/FVC ratio	NA	This study integrates mendelian randomization with metabolomics
FEV1:Forced Expiratory Volume in One Second; FVC:Forced Vital CapacityNMR: Nuclear Magnetic Resonance; GC-MS: GC-MS: gas chromatography mass spectrometry; LC-MS: Liquid chromatography-mass spectrometry; BAL, bronchoalveolar lavage; UHPLC, ultra-high performance liquid chromatography; LAM: Lymphangioleiomyomatosis; NA: Not available
